# Supplementary material
Source: publisher site journal article supplement (https://www.dovepress.com/article/247444)
Supplement: Supplementary file 1 [file get_supplementary_file.php]

**SURVEY MULTIDISCIPLINARY PROJECT PIEI-ES**

1. **BASE SURVEY n=1.205**
2. **SOCIODEMOGRAPHIC INFORMATION:**

**NAME : ________________________________________ AGE:** **________________**

**ID (RUT): ________________**

- 1. **RESIDENCE AREA: CITY: ______________**

(   ) Urban (   ) Rural **PHONE: _________________**

**ADDRESS: ____________________________________________________________________**

- 1. **DATE OF BIRTH:_________________ Sex ():**  (   ) Female (   ) Male ( ) Other

1. **LIST OF DRUGS (Mark with an X):**

| METFORMINA |  | HIDROCLOROTIAZIDA |  | NIFEDIPINO |  |
| --- | --- | --- | --- | --- | --- |
| GLIBENCLAMIDA |  | PROPANOLOL |  | FUROSEMIDA |  |
| PREDNISONA |  | LOSARTAN |  | ATORVASTATINA |  |
| ENALAPRIL |  | SIMPERTEN |  | LOVASTATINA |  |
|  |  | ASPIRINA |  | PARACETAMOL |  |

**Otros:­­­­­­­­­­­­­­­­­­­­­­­­____________________________________________**

1. **NUMBER OF MEDICATIONS (DRUGS) CONSUMED PER DAY:**

Prescribed by a health professional: N°: _____
